# Supplementary material for: Dietary Diversity, Household Food Insecurity and Stunting among Children Aged 12 to 59 Months in N’Djamena—Chad
Source: MDPI journal article supplement (doi:10.3390/nu15030573), 2023-01-21
Supplement: s1 [file s1]

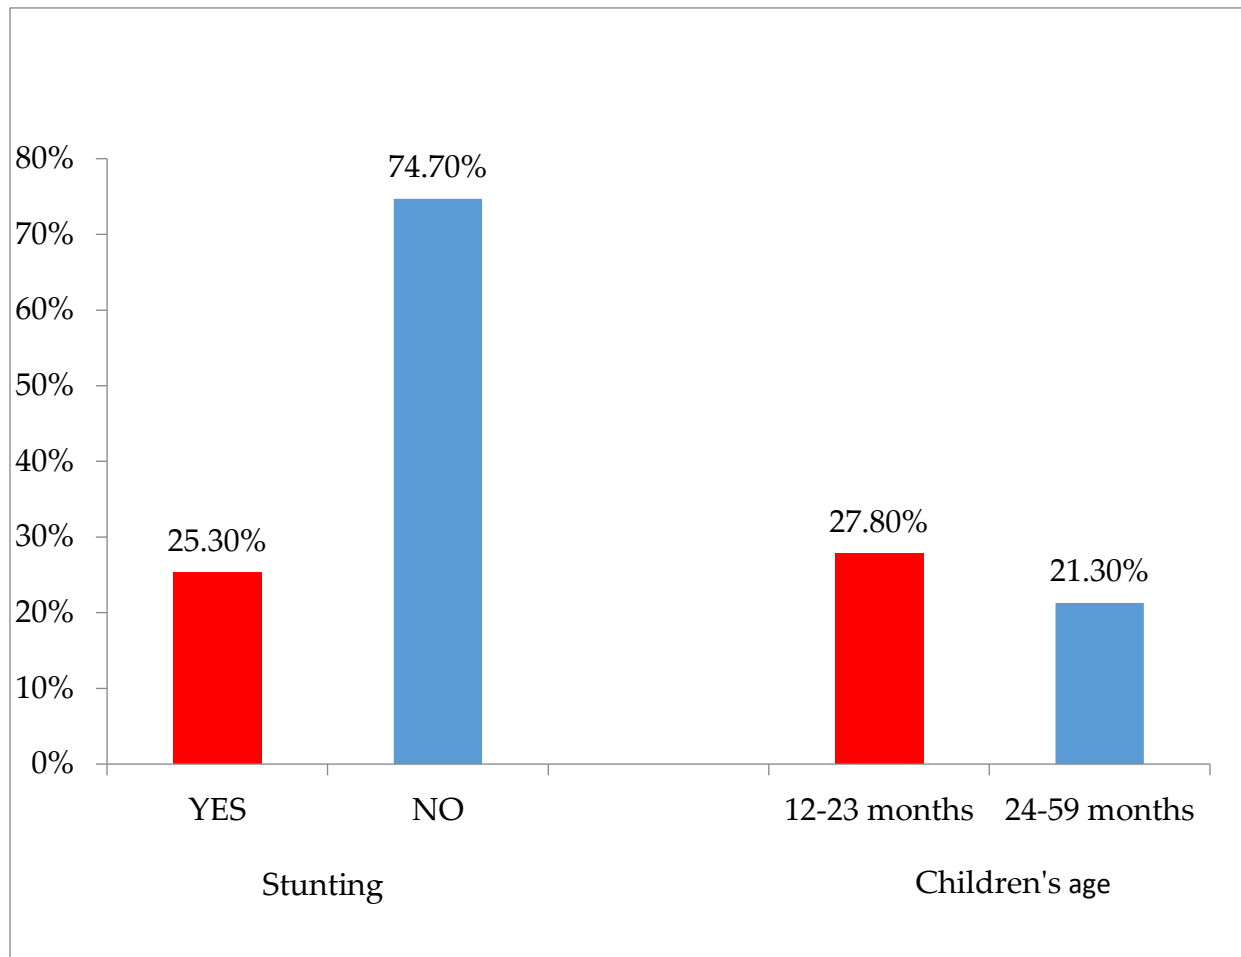

**Figure S1.** Frequency and age of children with stunting

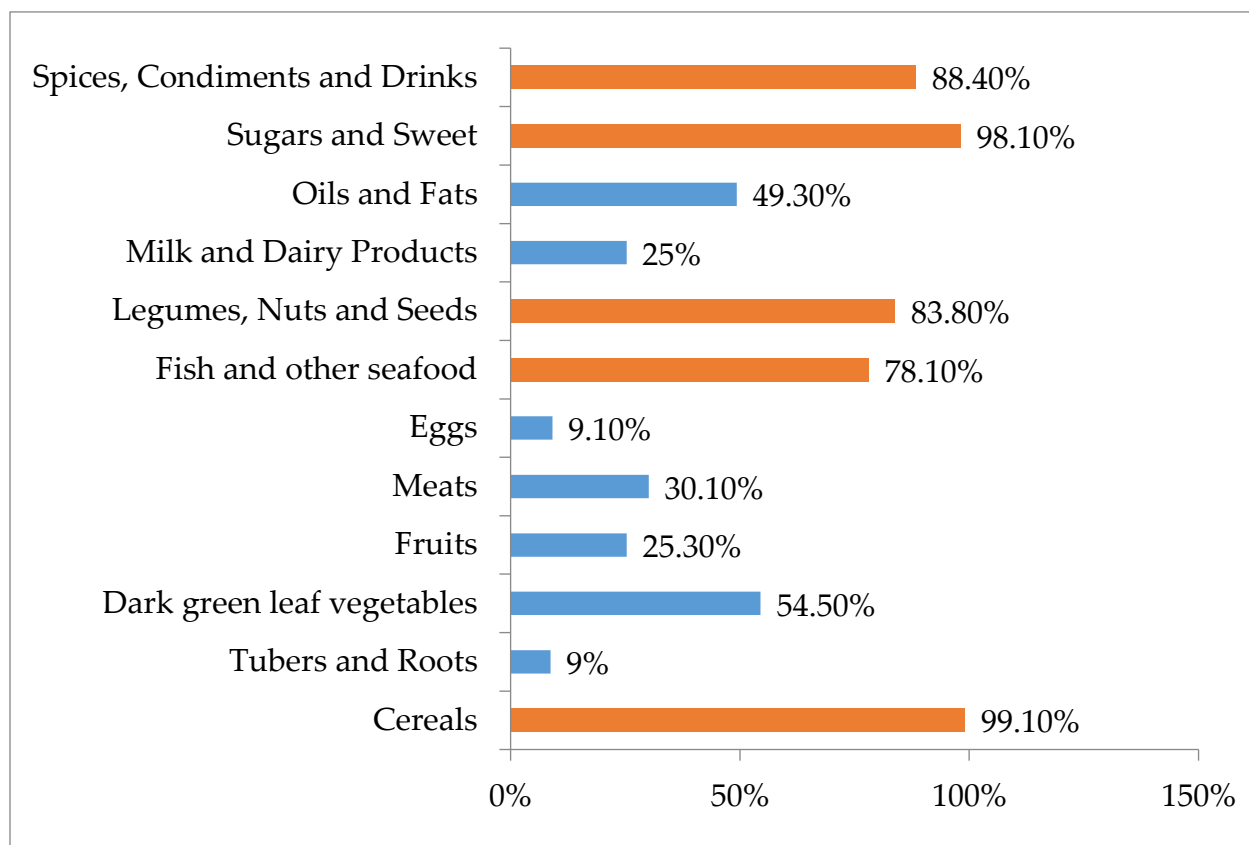

**Figure S2.** Distribution of food groups consumed by children during 24 h before the data collection
